# Supplementary material for: Accelerated Hantzsch electrospray synthesis with temporal control of reaction intermediates
Source: PubMed Central journal article supplement — Chem Sci. 2014 Sep 9;6(1):397–401. doi: 10.1039/c4sc02436b (PMC5485237; doi:10.1039/c4sc02436b), 2014-09-09

Accelerated Hantzsch Electrospray Synthesis with Temporal Control of Reaction Intermediates

**Supplementary Information**

Ryan M. Bain,<sup>a</sup> Christopher J. Pulliam,<sup>a</sup> R. Graham Cooks<sup>a, b, \*</sup>

\*Corresponding Author

<sup>a</sup>Department of Chemistry, Purdue University, West Lafayette IN 47907

<sup>b</sup>Center for Analytical Instrumentation Development, Purdue University, West Lafayette IN 47909

Corresponding Author Information:

R. Graham Cooks  
560 Oval Drive  
Department of Chemistry  
Purdue University  
West Lafayette, IN 47907-2084  
PH 765 494 5263  
FAX 765 494 9421  
[cooks@purdue.edu](mailto:cooks@purdue.edu)

**Graphical Abstract**

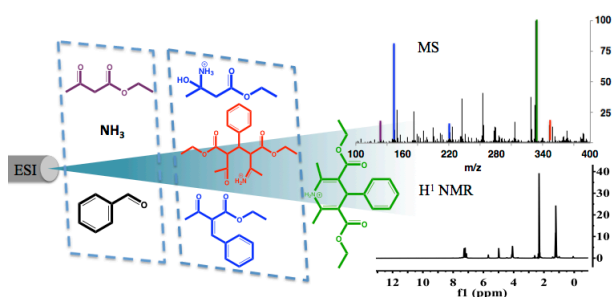

## Table of Contents

|                                                       |    |
|-------------------------------------------------------|----|
| Importance of the Hantzsch synthesis.....             | 3  |
| Table S1: Bulk reactions.....                         | 4  |
| Figure S1: NMR spectrum.....                          | 5  |
| Table S2: Amine results.....                          | 6  |
| Table S3: Amine substituent effects.....              | 7  |
| Table S4: Aldehyde results summary.....               | 12 |
| Table S5: Aldehyde substituent effects.....           | 13 |
| Figure S2: On-line distance.....                      | 15 |
| Table S6: On-line distance.....                       | 17 |
| Table S7: On-line distance into tube.....             | 19 |
| Table S8: Off-line distance with cold collection..... | 23 |
| Table S9: Ion transfer capillary temperature.....     | 25 |
| Table S10: Spray source variable.....                 | 27 |
| Experimental design 250 mg/hr .....                   | 28 |
| Photographs of off-line collection apparatus .....    | 29 |
| Photographs of cold collection apparatus .....        | 30 |

## Importance of the Hantzsch synthesis

The distinctive DHP class of molecules is of interest for pharmaceutical,<sup>1</sup> biological,<sup>2</sup> and microbial applications.<sup>3</sup> Nifedipine<sup>4-6</sup> (and analogs including amlodipine,<sup>7</sup> azelnidipine,<sup>8</sup> efonidipine,<sup>9</sup> lercanidipine,<sup>10</sup> manidipine,<sup>11</sup> and nicardipine<sup>12</sup>) is used as a calcium channel blocker for the treatment of hypertension and other cardiovascular diseases.<sup>13,14</sup>

- <sup>1</sup> R. R. Poondra, R. V. Nallamelli, C. L. T. Meda, B. N. V. Srinivas, A. Grover, J. Muttathathula, S. R. Voleti, B. Sridhar, M. Pal, and K. V. L. Parsa, *Bioorg. Med. Chem. Lett.*, 2013, **23**, 1104–9.
- <sup>2</sup> R. Thomsen, H. B. Rasmussen, and K. Linnet, *Drug Metab. Dispos.*, 2014, **42**, 126–33.
- <sup>3</sup> P. Mehta and P. Verma, *J. Chem.*, 2013, **2013**, 6–10.
- <sup>4</sup> W. Vater, G. Kroneberg, F. Hoffmeister, H. Kaller, K. Meng, W. Oberdorf, A. Puls, K. Schlossmann, and K. Stoepel, *Arzneimittelforschung.*, 1972, **22**, 1–14.
- <sup>5</sup> P. D. Henry and K. I. Bentley, *Rapid Publ.*, 1981, **68**, 1366–69.
- <sup>6</sup> G. R. McIlwraith, P. H. Kidner, and S. Oram, *Br. Heart J.*, 1980, **44**, 335–41.
- <sup>7</sup> J. Luksa, D. Josic, M. Kremser, Z. Kopitar, and S. Milutinovic, *J. Chromatogr. B. Biomed. Sci. Appl.*, 1997, **703**, 185–93.
- <sup>8</sup> K. Oizumi, H. Nishino, H. Koike, T. Sada, M. Miyamoto, and T. Kimura, *Japan J. Pharmacol.*, 1989, **51**, 57–64.
- <sup>9</sup> T. Yotsumoto, Y. Masuda, C. Shudo, H. Sugita, T. Yamashita, and S. Tanaka, *Gen. Pharmacol.*, 1995, **26**, 333–7.
- <sup>10</sup> V. Barrios, C. Escobar, a Navarro, L. Barrios, J. Navarro-Cid, and A. Calderón, *Int. J. Clin. Pract.*, 2006, **60**, 1364–70.
- <sup>11</sup> K. Mizuno, H. Haga, M. Takahashi, and S. Fukuchi, *Curr. Ther. Res.*, 1992, **52**, 248–53.
- <sup>12</sup> R. I. Huang, P. Patel, P. Walinsky, D. L. Fischman, J. D. Ogilby, M. Awar, C. Frankil, and M. P. Savage, *Catheter. Cardiovasc. Interv.*, 2006, **68**, 671–6.
- <sup>13</sup> U. Pleiss, *J. Label. Compd. Radiopharm.*, 2007, **50**, 818–30.
- <sup>14</sup> J.-G. Wang, *Vasc. Health Risk Manag.*, 2009, **5**, 593–605.

**Table S1** Bulk reaction conditions, time required and yields

| Phenylboronic acid catalyst with reflux |                            | Phenylboronic acid catalyst w/o reflux |                            | No catalysis or reflux |                            |
|-----------------------------------------|----------------------------|----------------------------------------|----------------------------|------------------------|----------------------------|
| Time (hours)                            | Percent Yield <sup>a</sup> | Time (hours)                           | Percent Yield <sup>a</sup> | Time (hours)           | Percent Yield <sup>a</sup> |
| 2                                       | 39                         | 2                                      | -                          | 2                      | -                          |
| 4                                       | 83                         | 4                                      | 7                          | 4                      | 3                          |
| 8                                       | 94                         | 8                                      | 23                         | 8                      | 7                          |
| 16                                      | 96                         | 16                                     | 49                         | 16                     | 13                         |
| 32                                      | -                          | 32                                     | 61                         | 32                     | 24                         |
| 64                                      | -                          | 64                                     | 82                         | 64                     | 37                         |

<sup>a</sup>Percent yield based on UV-Vis data collected at  $\lambda=378$  nm using molar absorptivity of  $5.2 \times 10^3$  L/mol\*cm<sup>48</sup>

**Figure S1** NMR spectra

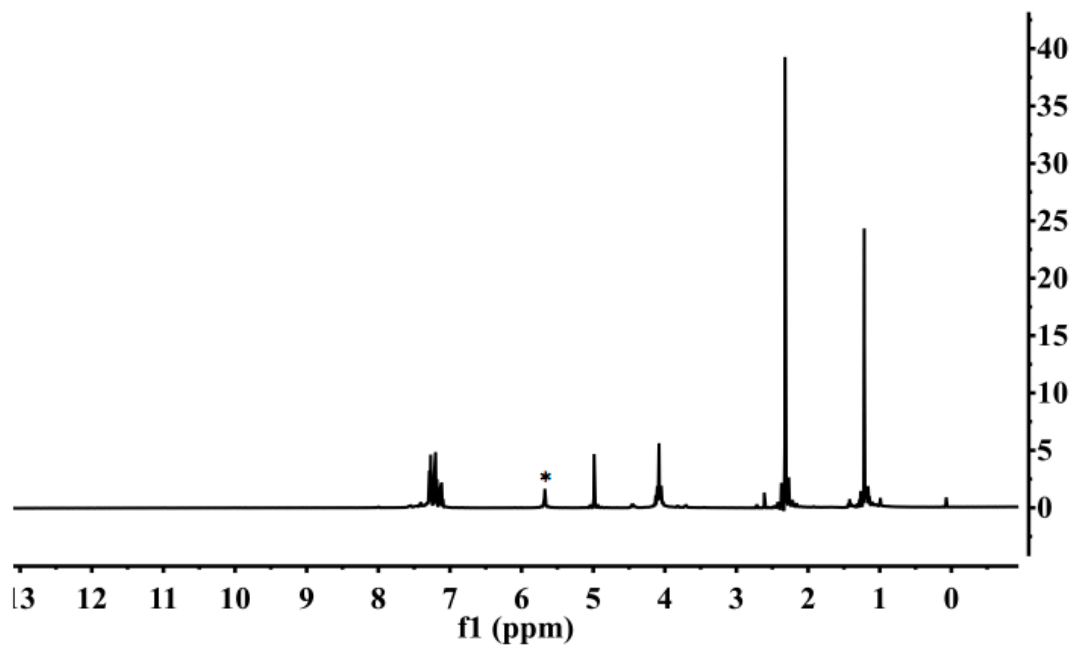

**Figure S1** NMR of product from spray after recrystallization in chloroform-d which is in agreement with bulk phase experiments and literature. \* denotes solvent peak.

**Table S2** Amine reactions in spray and bulk modes

|                        | <b>2</b> |          | <b>Amine</b> |          | <b>5</b> |          | <b>7</b> |          | <b>9</b> |          |
|------------------------|----------|----------|--------------|----------|----------|----------|----------|----------|----------|----------|
|                        | <i>S</i> | <i>B</i> | <i>S</i>     | <i>B</i> | <i>S</i> | <i>B</i> | <i>S</i> | <i>B</i> | <i>S</i> | <i>B</i> |
| ammonia                | x        | x        | -            | -        | x        | x        | x        | x        | x        | x        |
| pentan-1-amine         | x        | x        | x            | x        | x        | x        | -        | -        | -        | -        |
| butan-1-amine          | x        | x        | x            | x        | x        | x        | -        | -        | -        | -        |
| 2-methylbutan-1-amine  | x        | x        | x            | x        | x        | x        | -        | -        | -        | -        |
| 2-methylbutan-2-amine  | x        | x        | x            | x        | x        | x        | -        | -        | -        | -        |
| 3-methylbutan-1-amine  | x        | x        | x            | x        | x        | x        | -        | -        | -        | -        |
| 2-methylpropan-2-amine | x        | x        | x            | x        | x        | x        | -        | -        | -        | -        |
| dibutylamine           | x        | x        | x            | x        | x        | x        | -        | -        | -        | -        |
| tributylamine          | x        | x        | x            | x        | -        | -        | -        | -        | -        | -        |

S denotes sprayed reaction mixture. B denotes bulk phase reactions.  
Due to ion suppression some identifications were performed in MS<sup>2</sup>.

**Table S3** Amine substituent effects

| Nitrogen Source                                                                                         | Spectral Details                                            | Spectra                                                                              |
|---------------------------------------------------------------------------------------------------------|-------------------------------------------------------------|--------------------------------------------------------------------------------------|
| ammonium acetate<br><br>(Product $m/z = 330$ )<br><br>(Intermediates <b>5,7</b><br>$m/z = 148, 348$ )   | ESI synthesis<br>(75 cm, 200°C<br>inlet<br>temperature)     | 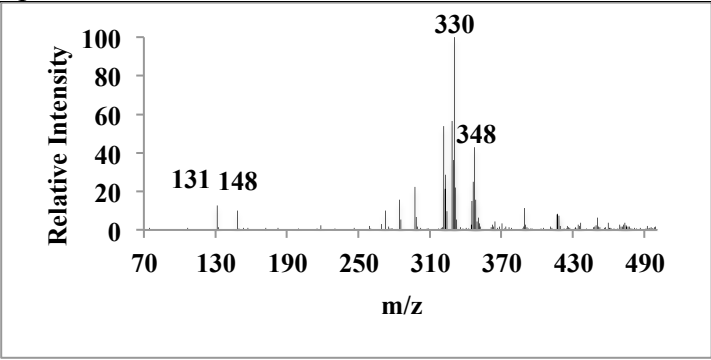   |
|                                                                                                         | Sprayed bulk<br>phase (2 cm,<br>100°C inlet<br>temperature) |   |
| pentan-1-amine<br><br>(Intermediate <b>5</b><br>$m/z = 218$ )<br><br>(Starting Material<br>$m/z = 88$ ) | ESI synthesis<br>(75 cm, 200°C<br>inlet<br>temperature)     |  |
|                                                                                                         | Sprayed bulk<br>phase (2 cm,<br>100°C inlet<br>temperature) |  |

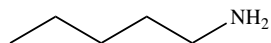

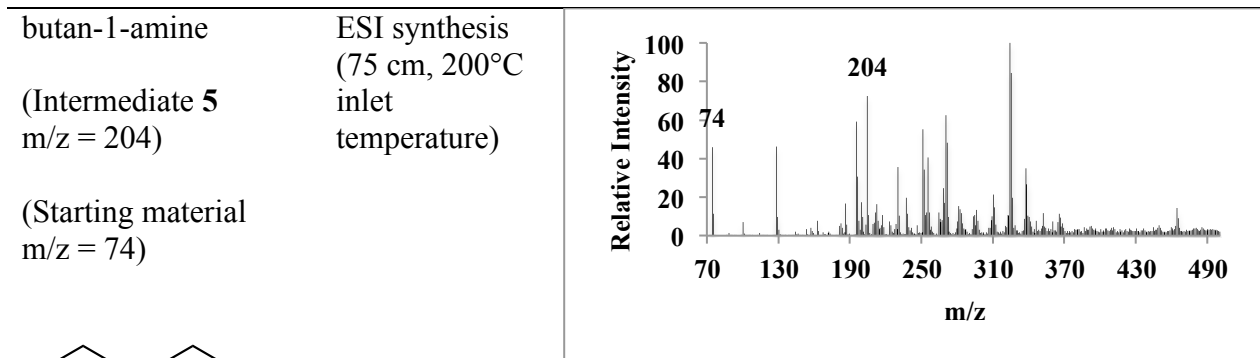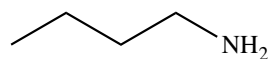

Sprayed bulk  
phase (2 cm,  
100°C inlet  
temperature)

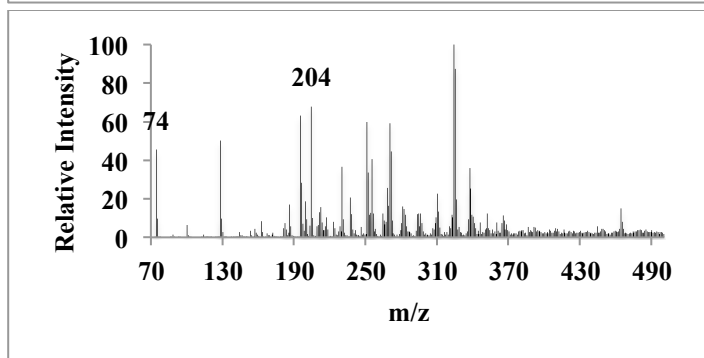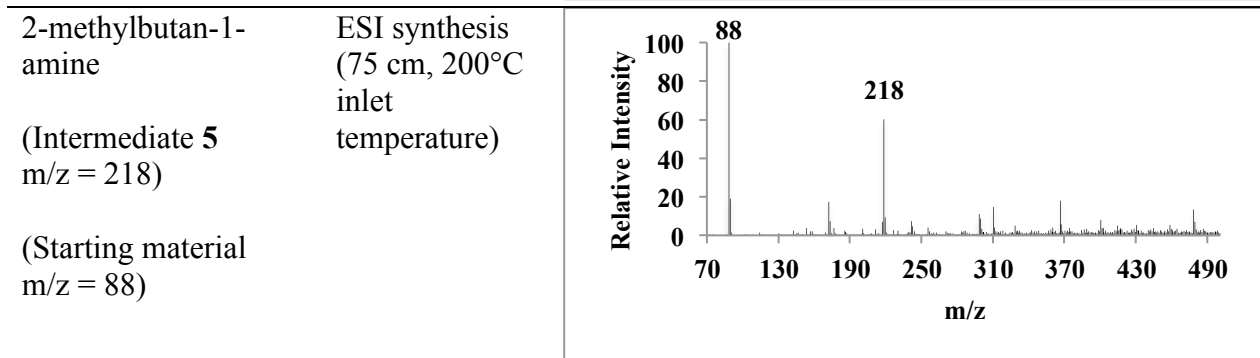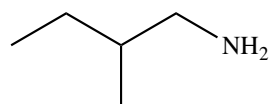

Sprayed bulk  
phase (2 cm,  
100°C inlet  
temperature)

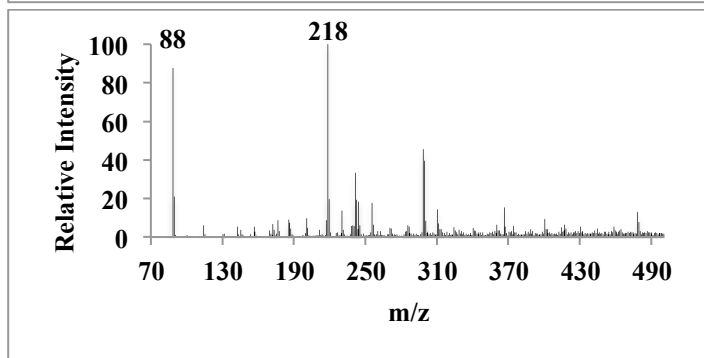



|                                                                                     |                                                    |                                                                                      |
|-------------------------------------------------------------------------------------|----------------------------------------------------|--------------------------------------------------------------------------------------|
| 2-methylbutan-2-amine                                                               | ESI synthesis<br>(75 cm, 200°C inlet temperature)  | 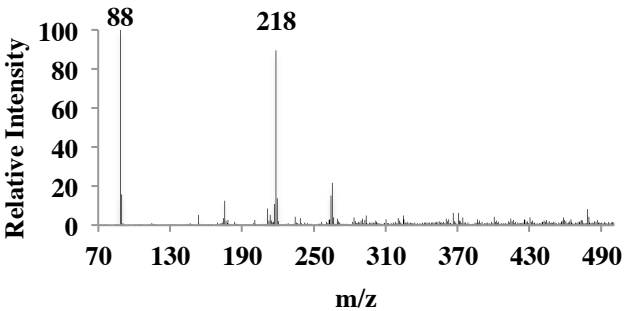   |
| (Intermediate 5<br>m/z = 218)                                                       |                                                    |                                                                                      |
| (Starting material<br>m/z = 88)                                                     |                                                    |                                                                                      |
|    | Sprayed bulk phase (2 cm, 100°C inlet temperature) |    |
| 3-methylbutan-1-amine                                                               | ESI synthesis<br>(75 cm, 200°C inlet temperature)  |   |
| (Intermediate 5<br>m/z = 218)                                                       |                                                    |                                                                                      |
| (Starting material<br>m/z = 88)                                                     |                                                    |                                                                                      |
|  | Sprayed bulk phase (2 cm, 100°C inlet temperature) |  |

|                                                                                     |                                                    |                                                                                      |
|-------------------------------------------------------------------------------------|----------------------------------------------------|--------------------------------------------------------------------------------------|
| 2-methylpropan-2-amine                                                              | ESI synthesis<br>(75 cm, 200°C inlet temperature)  | 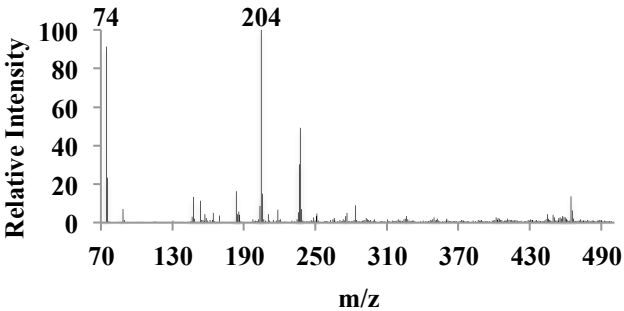   |
| (Intermediate 5<br>m/z = 204)                                                       |                                                    |                                                                                      |
| (Starting material<br>m/z = 74)                                                     |                                                    |                                                                                      |
|    | Sprayed bulk phase (2 cm, 100°C inlet temperature) |    |
| dibutylamine                                                                        | ESI synthesis<br>(75 cm, 200°C inlet temperature)  |   |
| (Starting material<br>m/z = 130)                                                    |                                                    |                                                                                      |
| (Intermediate 5<br>m/z = 260)                                                       |                                                    |                                                                                      |
|  | Sprayed bulk phase (2 cm, 100°C inlet temperature) |  |

|                                                                                   |                                                             |                                                                                    |
|-----------------------------------------------------------------------------------|-------------------------------------------------------------|------------------------------------------------------------------------------------|
| tributylamine<br>(Starting material<br>m/z =186)                                  | ESI synthesis<br>(75 cm, 200°C<br>inlet<br>temperature)     | 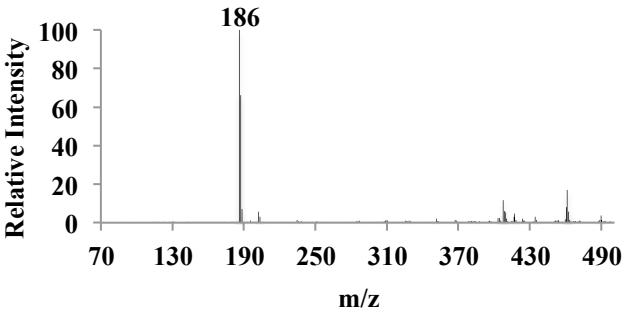 |
|  | Sprayed bulk<br>phase (2 cm,<br>100°C inlet<br>temperature) |  |

**Table S3** A compilation of spectra supporting Table S2. Shows the similarity and differences between the spectra from the bulk phase product as well as the ESI synthesis.

**Table S4** Aldehyde effect summary

|                           | <b>2</b> |          | <b>3</b> |          | <b>4</b> |          | <b>7</b> |          | <b>9</b> |          |
|---------------------------|----------|----------|----------|----------|----------|----------|----------|----------|----------|----------|
|                           | <u>S</u> | <u>B</u> |
| benzaldehyde              | -        | -        | x        | x        | x        | x        | x        | x        | x        | x        |
| 2-phenylacetaldehyde      | -        | -        | x        | x        | x        | x        | x        | x        | x        | x        |
| acetaldehyde              | -        | -        | x        | x        | x        | x        | x        | x        | x        | x        |
| 4-nitrobenzaldehyde       | -        | -        | x        | x        | x        | x        | x        | x        | x        | x        |
| anthracene-9-carbaldehyde | x        | x        | -        | -        | -        | -        | -        | -        | -        | -        |
| dodecanal                 | -        | -        | x        | x        | x        | x        | x        | x        | x        | x        |

S denotes sprayed reaction mixture. B denotes bulk phase reactions. Due to ion suppression some identifications were performed in MS<sup>2</sup>.

**Table S5** Aldehyde substituent effects

| Aldehyde                                                                                                                                      | Spectral Details                                            | Spectra                                                                              |
|-----------------------------------------------------------------------------------------------------------------------------------------------|-------------------------------------------------------------|--------------------------------------------------------------------------------------|
| benzaldehyde<br><br>(Product $m/z = 330$ )<br><br>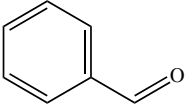           | ESI synthesis<br>(75 cm, 200°C<br>inlet<br>temperature)     |    |
|                                                                                                                                               | Sprayed bulk<br>phase (2 cm,<br>100°C inlet<br>temperature) |   |
| 2-phenylacetaldehyde<br><br>(Product $m/z = 344$ )<br><br> | ESI synthesis<br>(75 cm, 200°C<br>inlet<br>temperature)     |  |
|                                                                                                                                               | Sprayed bulk<br>phase (2 cm,<br>100°C inlet<br>temperature) |  |

|                                                                                     |                                                                       |                                                                                      |
|-------------------------------------------------------------------------------------|-----------------------------------------------------------------------|--------------------------------------------------------------------------------------|
| <p>acetaldehyde<br/>(Product <math>m/z = 268</math>)</p>                            | <p>ESI synthesis<br/>(75 cm, 200°C<br/>inlet<br/>temperature)</p>     | 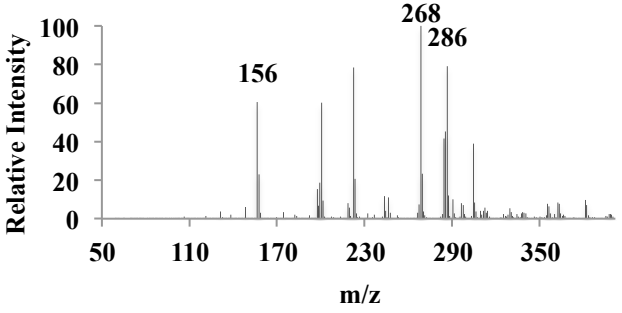   |
|    | <p>Sprayed bulk<br/>phase (2 cm,<br/>100°C inlet<br/>temperature)</p> |    |
| <p>4-nitrobenzaldehyde<br/>(Product <math>m/z = 375</math>)</p>                     | <p>ESI synthesis<br/>(75 cm, 200°C<br/>inlet<br/>temperature)</p>     |   |
|  | <p>Sprayed bulk<br/>phase (2 cm,<br/>100°C inlet<br/>temperature)</p> |  |

|                                                                                           |                                                           |                                                                                      |
|-------------------------------------------------------------------------------------------|-----------------------------------------------------------|--------------------------------------------------------------------------------------|
| <p>anthracene-9-carbaldehyde</p> <p>(Product <math>m/z = 430^*</math>)<br/>* not seen</p> | <p>ESI synthesis<br/>(75 cm, 200°C inlet temperature)</p> | 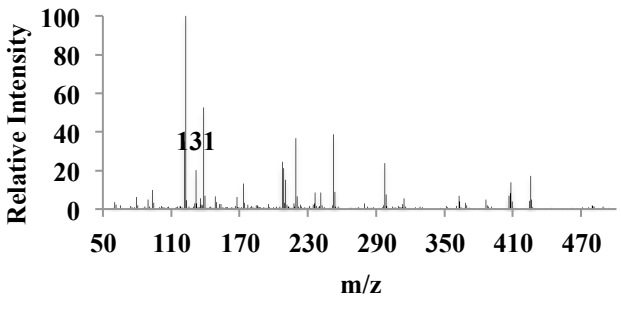   |
|          | <p>Sprayed bulk phase (2 cm, 100°C inlet temperature)</p> |    |
| <p>dodecanal</p> <p>(Product <math>m/z = 408</math>)</p>                                  | <p>ESI synthesis<br/>(75 cm, 200°C inlet temperature)</p> |   |
|        | <p>Sprayed bulk phase (2 cm, 100°C inlet temperature)</p> |  |

**Table S5** A compilation of spectra supporting Table S4. Shows the similarity and differences between the spectra from the bulk phase product as well as the ESI synthesis.

**Figure S2** On-line distance

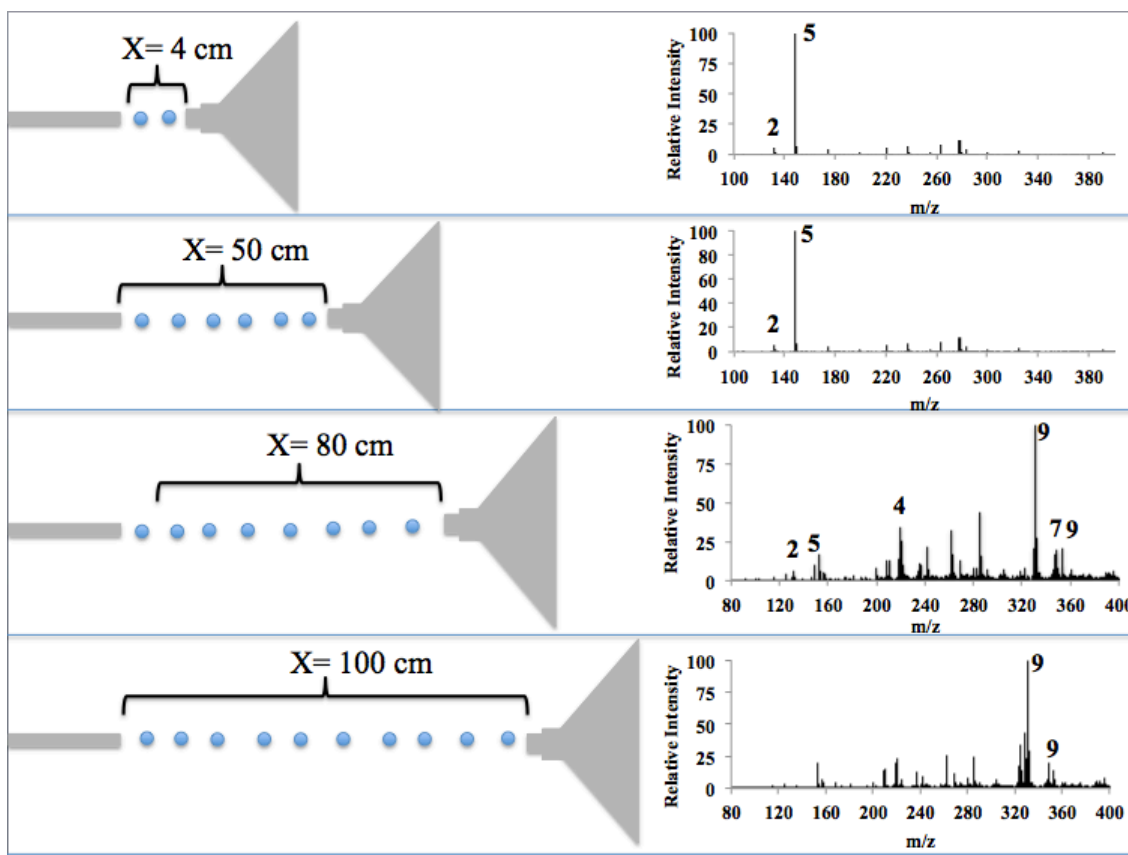

**Figure S2** Stages of reaction completeness in the droplets traveling between the MS inlet and the sprayer as a function of distance (x).



**Table S6** On-line distance

| Distance (cm) | Spectra                                                                                                                                                                                                                                                                                                                                                                                                                                                                                                  |
|---------------|----------------------------------------------------------------------------------------------------------------------------------------------------------------------------------------------------------------------------------------------------------------------------------------------------------------------------------------------------------------------------------------------------------------------------------------------------------------------------------------------------------|
| 4 cm          | 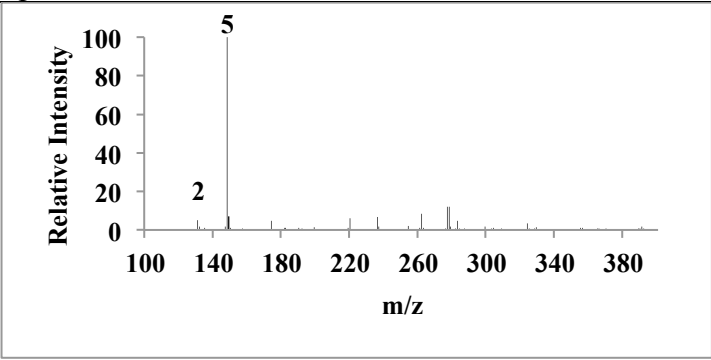 <p>Mass spectrum at 4 cm distance. The x-axis is m/z (100-380) and the y-axis is Relative Intensity (0-100). The base peak is at m/z 5 (100% intensity). A significant peak is at m/z 2 (~20% intensity). Other minor peaks are visible at m/z 140, 150, 260, 270, 280, and 290.</p>                                                                                                                                  |
| 50 cm         |  <p>Mass spectrum at 50 cm distance. The x-axis is m/z (100-380) and the y-axis is Relative Intensity (0-100). The base peak is at m/z 5 (100% intensity). A significant peak is at m/z 2 (~20% intensity). Other minor peaks are visible at m/z 140, 150, 260, 270, 280, and 290.</p>                                                                                                                                |
| 60 cm         |  <p>Mass spectrum at 60 cm distance. The x-axis is m/z (100-380) and the y-axis is Relative Intensity (0-100). The base peak is at m/z 5 (100% intensity). Significant peaks are at m/z 9 (~40% intensity) and m/z 8 (~25% intensity). A peak at m/z 2 is also present (~20% intensity). Other minor peaks are visible at m/z 140, 150, 260, 270, 280, and 290.</p>                                                  |
| 70 cm         |  <p>Mass spectrum at 70 cm distance. The x-axis is m/z (100-380) and the y-axis is Relative Intensity (0-100). The base peak is at m/z 9 (100% intensity). Significant peaks are at m/z 5 (~80% intensity), m/z 4 (~40% intensity), m/z 7 (~30% intensity), and m/z 9 (~20% intensity). A peak at m/z 2 is also present (~20% intensity). Other minor peaks are visible at m/z 140, 150, 260, 270, 280, and 290.</p> |

80 cm

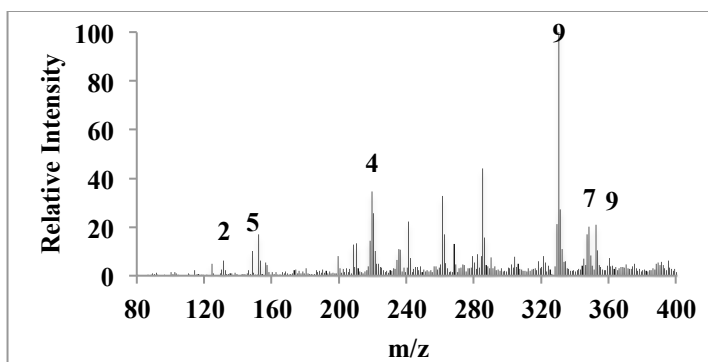

100 cm

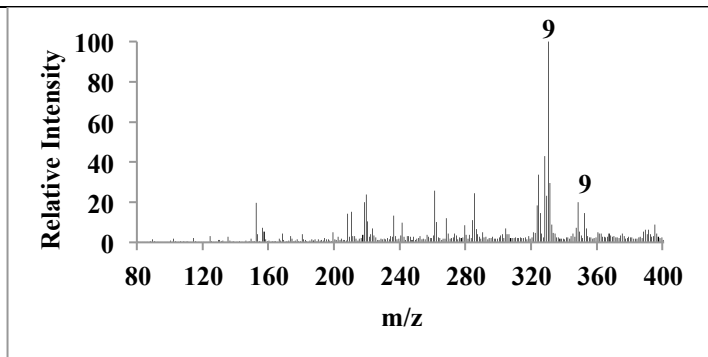

**Table S6** Collected spectra for distances between the ion transfer capillary and the spray source. Capillary temperature 150°C with a total flow rate of 50  $\mu\text{L}/\text{min}$  and a nitrogen gas pressure of 125 psi. Other variables are consistent with Table S1.

**Table S7** On-line distance with tube

| Tube length (cm) | Spectra                                                                              |
|------------------|--------------------------------------------------------------------------------------|
| 20 cm            | 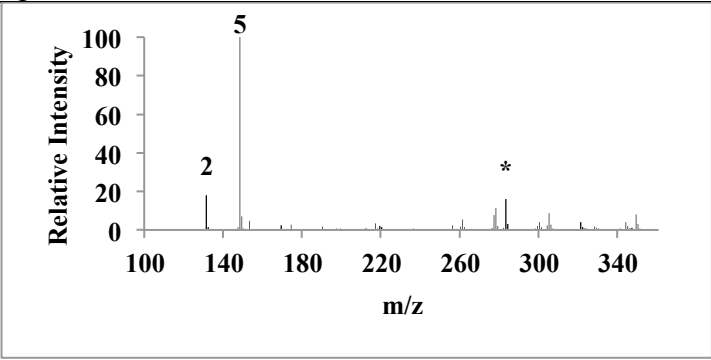   |
| 30 cm            |   |
| 40 cm            |  |
| 50 cm            |  |

55 cm

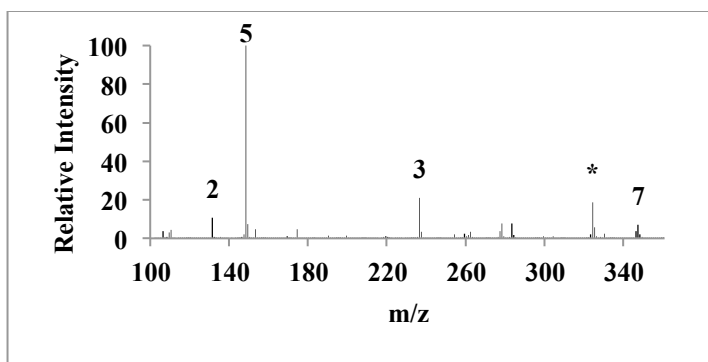

60 cm

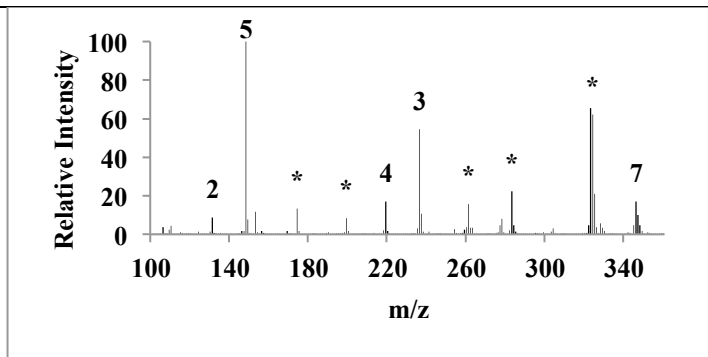

65 cm

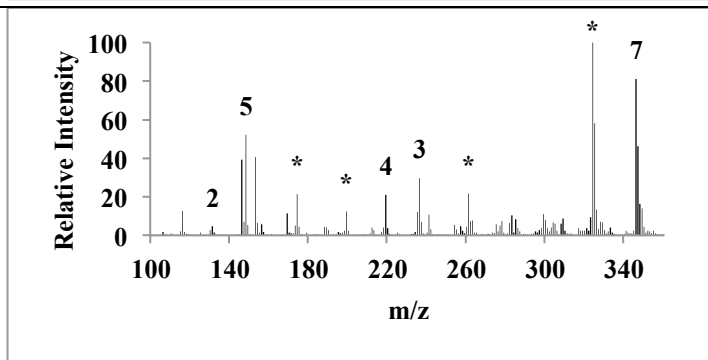

70 cm

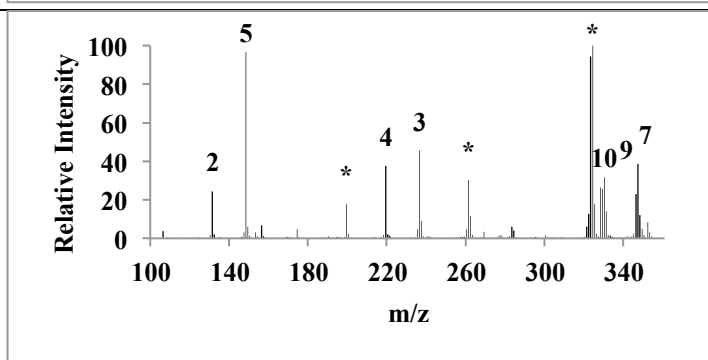

75 cm

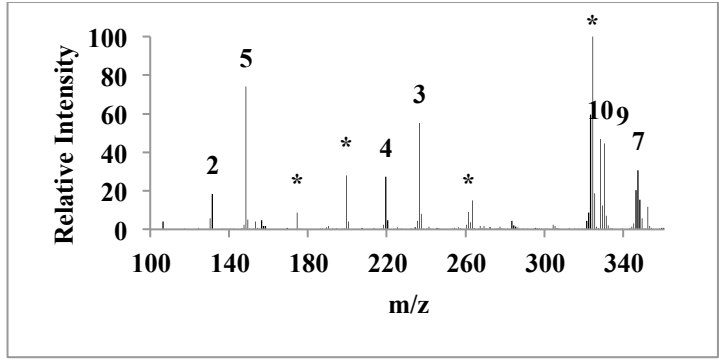

80 cm

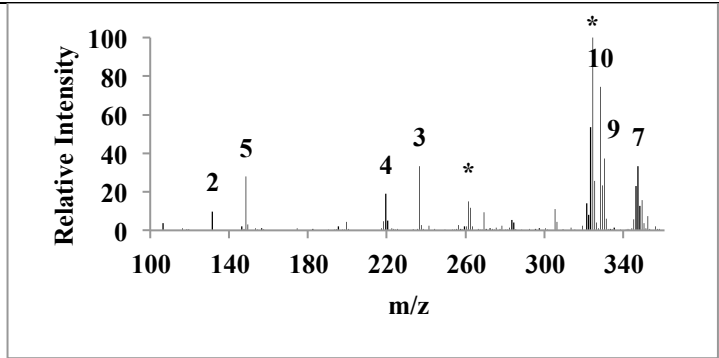

85 cm

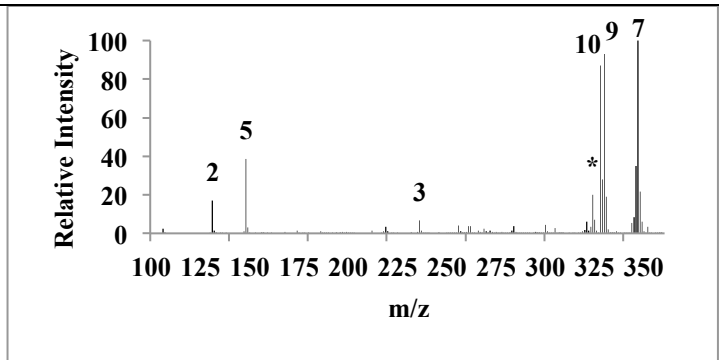

90 cm

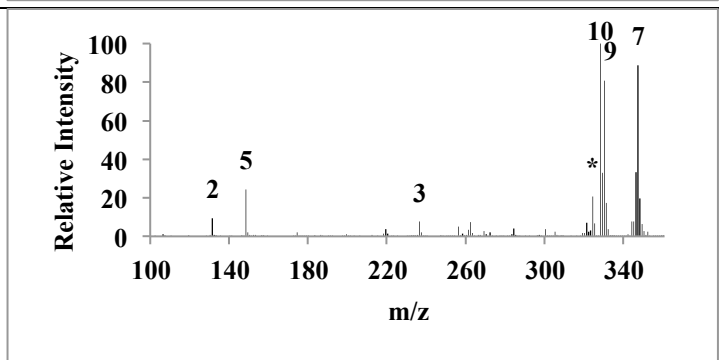

95 cm

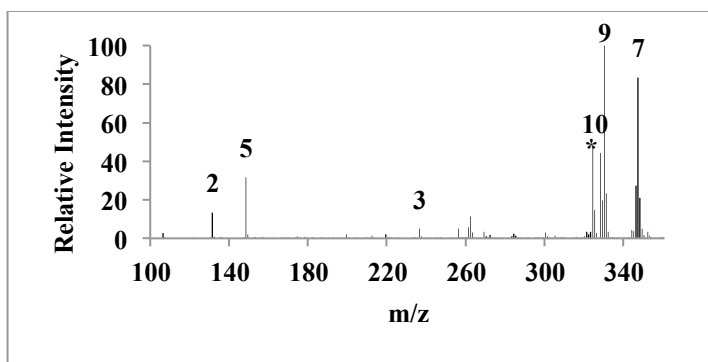

---

**Table S7** Collected spectra for distances between the ion transfer capillary and the spray source with a stainless steel tube of length (x) in between. 5 cm were between the tube and the MS. Capillary temperature 150°C with a total flow rate of 50  $\mu\text{L}/\text{min}$  and a nitrogen gas pressure of 125 psi. Other variables are consistent with Table S1.

---

**Table S8** Off-line distance with cold collection

| Distance | Spectra                                                                                                                                                                                                                                                                                                                                                                                                                                                                                    |     |                    |     |     |     |     |   |     |
|----------|--------------------------------------------------------------------------------------------------------------------------------------------------------------------------------------------------------------------------------------------------------------------------------------------------------------------------------------------------------------------------------------------------------------------------------------------------------------------------------------------|-----|--------------------|-----|-----|-----|-----|---|-----|
| 4 cm     | 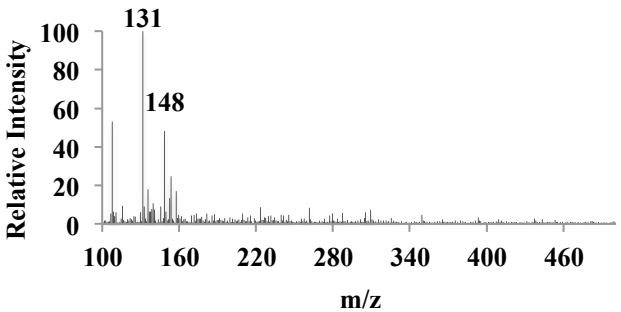 <p>Mass spectrum for 4 cm distance. The y-axis is Relative Intensity (0 to 100) and the x-axis is m/z (100 to 460). The base peak is at m/z 131. Other significant peaks are at m/z 148.</p> <table border="1"><thead><tr><th>m/z</th><th>Relative Intensity</th></tr></thead><tbody><tr><td>131</td><td>100</td></tr><tr><td>148</td><td>~60</td></tr></tbody></table>                                 | m/z | Relative Intensity | 131 | 100 | 148 | ~60 |   |     |
| m/z      | Relative Intensity                                                                                                                                                                                                                                                                                                                                                                                                                                                                         |     |                    |     |     |     |     |   |     |
| 131      | 100                                                                                                                                                                                                                                                                                                                                                                                                                                                                                        |     |                    |     |     |     |     |   |     |
| 148      | ~60                                                                                                                                                                                                                                                                                                                                                                                                                                                                                        |     |                    |     |     |     |     |   |     |
| 25 cm    |  <p>Mass spectrum for 25 cm distance. The y-axis is Relative Intensity (0 to 100) and the x-axis is m/z (100 to 460). The base peak is at m/z 2. Other significant peaks are at m/z 5 and 3.</p> <table border="1"><thead><tr><th>m/z</th><th>Relative Intensity</th></tr></thead><tbody><tr><td>2</td><td>100</td></tr><tr><td>5</td><td>~80</td></tr><tr><td>3</td><td>~40</td></tr></tbody></table>   | m/z | Relative Intensity | 2   | 100 | 5   | ~80 | 3 | ~40 |
| m/z      | Relative Intensity                                                                                                                                                                                                                                                                                                                                                                                                                                                                         |     |                    |     |     |     |     |   |     |
| 2        | 100                                                                                                                                                                                                                                                                                                                                                                                                                                                                                        |     |                    |     |     |     |     |   |     |
| 5        | ~80                                                                                                                                                                                                                                                                                                                                                                                                                                                                                        |     |                    |     |     |     |     |   |     |
| 3        | ~40                                                                                                                                                                                                                                                                                                                                                                                                                                                                                        |     |                    |     |     |     |     |   |     |
| 50 cm    |  <p>Mass spectrum for 50 cm distance. The y-axis is Relative Intensity (0 to 100) and the x-axis is m/z (100 to 460). The base peak is at m/z 2. Other significant peaks are at m/z 5 and 3.</p> <table border="1"><thead><tr><th>m/z</th><th>Relative Intensity</th></tr></thead><tbody><tr><td>2</td><td>100</td></tr><tr><td>5</td><td>~90</td></tr><tr><td>3</td><td>~25</td></tr></tbody></table> | m/z | Relative Intensity | 2   | 100 | 5   | ~90 | 3 | ~25 |
| m/z      | Relative Intensity                                                                                                                                                                                                                                                                                                                                                                                                                                                                         |     |                    |     |     |     |     |   |     |
| 2        | 100                                                                                                                                                                                                                                                                                                                                                                                                                                                                                        |     |                    |     |     |     |     |   |     |
| 5        | ~90                                                                                                                                                                                                                                                                                                                                                                                                                                                                                        |     |                    |     |     |     |     |   |     |
| 3        | ~25                                                                                                                                                                                                                                                                                                                                                                                                                                                                                        |     |                    |     |     |     |     |   |     |
| 60 cm    |  <p>Mass spectrum for 60 cm distance. The y-axis is Relative Intensity (0 to 100) and the x-axis is m/z (100 to 460). The base peak is at m/z 5. Other significant peaks are at m/z 2 and 3.</p> <table border="1"><thead><tr><th>m/z</th><th>Relative Intensity</th></tr></thead><tbody><tr><td>5</td><td>100</td></tr><tr><td>2</td><td>~80</td></tr><tr><td>3</td><td>~25</td></tr></tbody></table> | m/z | Relative Intensity | 5   | 100 | 2   | ~80 | 3 | ~25 |
| m/z      | Relative Intensity                                                                                                                                                                                                                                                                                                                                                                                                                                                                         |     |                    |     |     |     |     |   |     |
| 5        | 100                                                                                                                                                                                                                                                                                                                                                                                                                                                                                        |     |                    |     |     |     |     |   |     |
| 2        | ~80                                                                                                                                                                                                                                                                                                                                                                                                                                                                                        |     |                    |     |     |     |     |   |     |
| 3        | ~25                                                                                                                                                                                                                                                                                                                                                                                                                                                                                        |     |                    |     |     |     |     |   |     |

80 cm

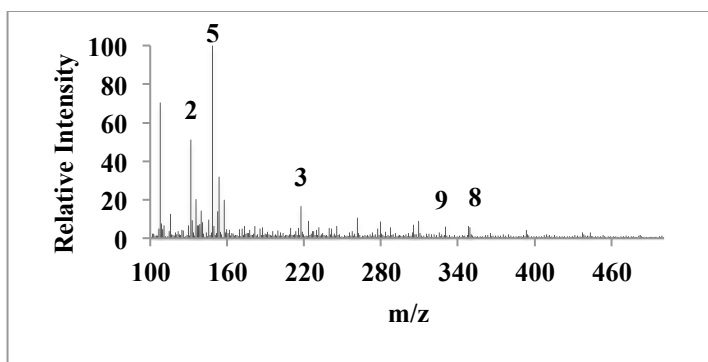

100 cm

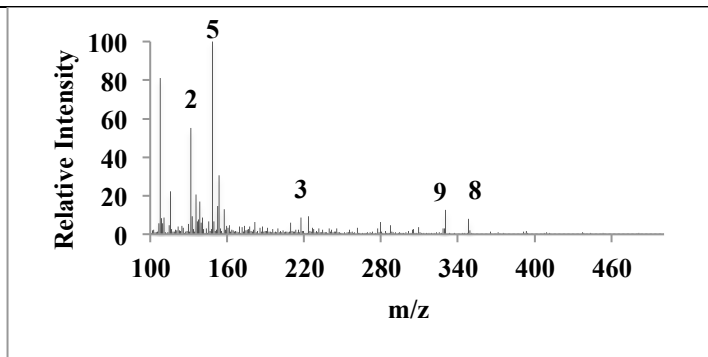

**Table S8** Collected spectra from a distance study with collection on a surface kept at  $\sim -77^\circ\text{C}$  by a dry-ice/IPA bath. Total flow rate of  $50 \mu\text{L}/\text{min}$  and a nitrogen gas pressure of 125 psi. Other variables are consistent with Table S1.



**Table S9** Ion transfer capillary temperature

| Capillary Temperature (°C) | Spectra                                                                              |
|----------------------------|--------------------------------------------------------------------------------------|
| 150°C                      | 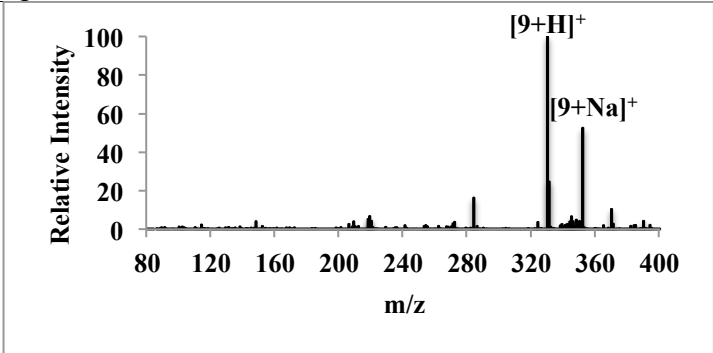   |
|                            |   |
| 250°C                      |  |
|                            |  |

350°C

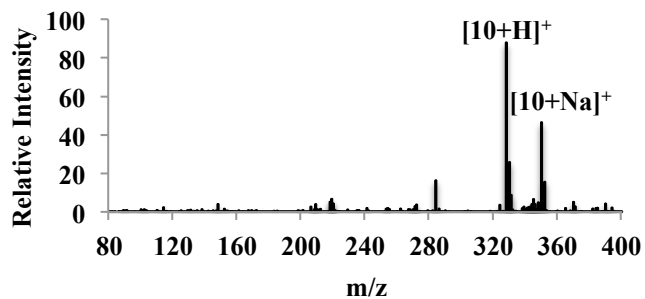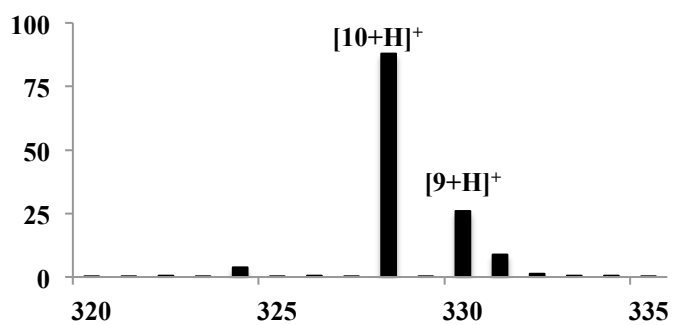

**Table S9** Ion transfer capillary temperature varied with a constant distant of 100 cm between the MS and the spray source. A total flow rate of 50  $\mu\text{L}/\text{min}$  and a nitrogen gas pressure of 125 psi was used throughout. Other variables are available in Table S1.

**Table S10** Spray source variable

| Variable                                                                       |                          | Value                            |
|--------------------------------------------------------------------------------|--------------------------|----------------------------------|
| Capillary length (in source)                                                   | <i>Inner (silica)</i>    | 50 mm                            |
|                                                                                | <i>Outer (stainless)</i> | 100 mm                           |
| Capillary diameter (ID)                                                        | <i>Inner (silica)</i>    | 100 $\mu\text{m}$                |
|                                                                                | <i>Outer (stainless)</i> | $\sim 500 \mu\text{m}$           |
| Flow rate                                                                      | <i>Reagent</i>           | 5 - 100 $\mu\text{L}/\text{min}$ |
|                                                                                | <i>Gas</i>               | 50 - 125 psi                     |
| Mixing methods                                                                 |                          | Upchurch static mixing T         |
| Spray geometry                                                                 | <i>Angle</i>             | 45°                              |
|                                                                                | <i>Distance</i>          | 5 cm                             |
| Voltage                                                                        |                          | +/- 5 kV                         |
| Concentration sprayed                                                          |                          | 0.1-100 mM                       |
| Collection surface                                                             |                          | Beaker & colander                |
| Optimized ESI and collection variables used throughout unless otherwise noted. |                          |                                  |

## 250 mg/hr experimental design

In order to achieve product formation at 250 mg/hr 85 mM solutions of benzaldehyde, ethyl acetoacetate, and ammonium acetate were used. The benzaldehyde and ammonium acetate were loaded into 10.0 mL Hamilton gas-tight syringes fitted with luer-locks. Since the ethyl acetoacetate is needed in a 2 molar equivalent, 20.0 mL were loaded into a 25.0 mL syringe. Flow rates of 166  $\mu\text{L}/\text{min}$  for benzaldehyde and ammonium acetate and 332  $\mu\text{L}/\text{min}$  for ethyl acetoacetate (or 664  $\mu\text{L}/\text{min}$  at the sprayer) were used for maximum yield experiments. Desolvation was also aided by 125 psi of nitrogen gas supplied by a liquid nitrogen tank. The optimized spray surface of a grounded steel colander sitting on a rotating beaker was rinsed with 100 mL of ethanol as a diluent. A total dilution of 4 L was done in series. This experimental procedure allowed for optimization because  $\sim 90\%$  yield was  $\sim 1$  Abs unit for UV-Vis analysis.

Recovery experiments were also performed where synthesized **9** was sprayed at 85 mM and recovered on the collection surface. This showed an average percent recovery of 95%. Surfaces can greatly affect the percent recovery as well as the percent yield due to the high pressure of sheath gas.

Off-line Apparatus Photos

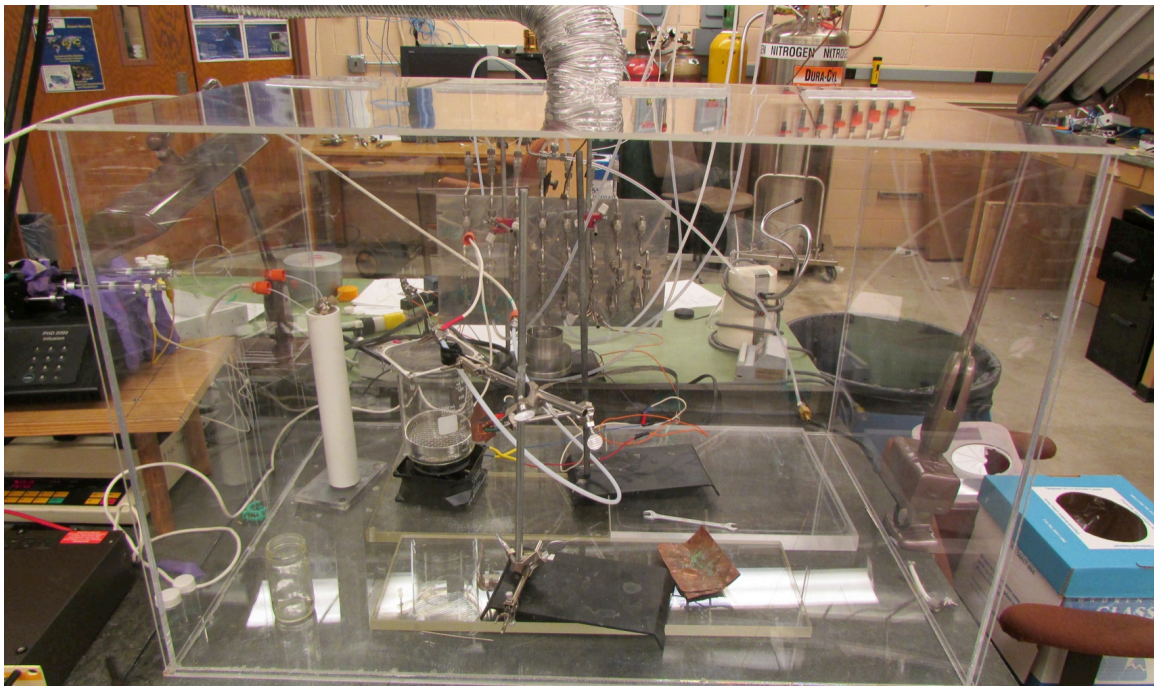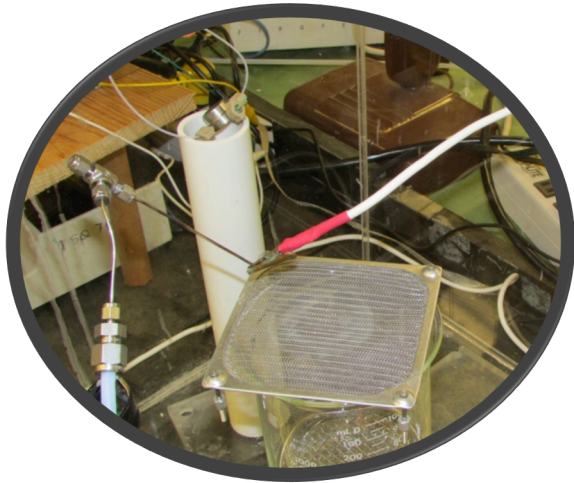

## Cold Collection Photos

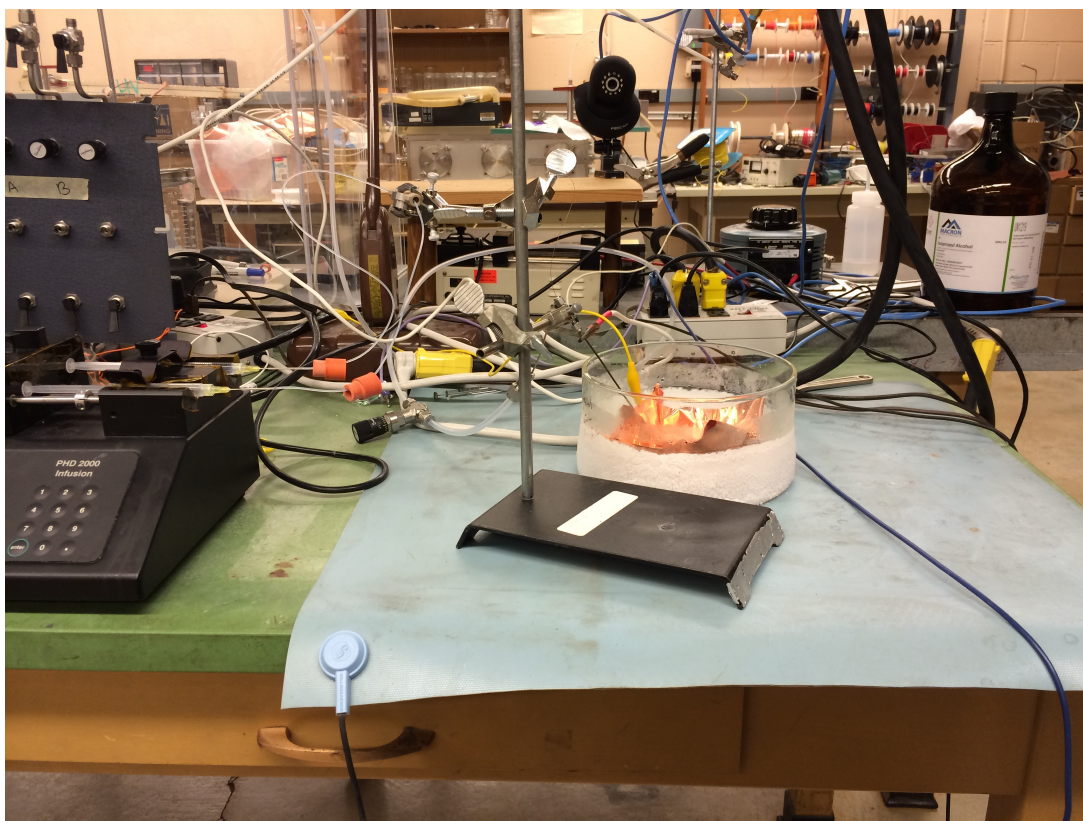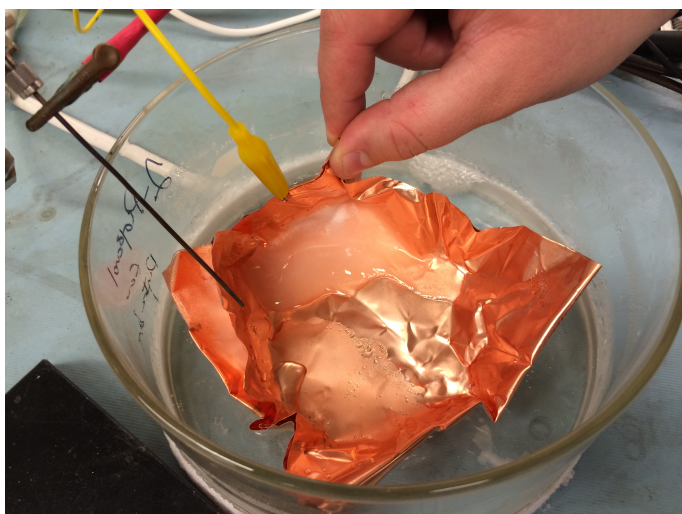

Supplement: SC-006-C4SC02436B-s001.pdf [file SC-006-C4SC02436B-s001.pdf]
